# Supplementary material for: Significant improvement and mechanism of tetracycline degradation with the synergistic piezoelectric effect of ZnO/CuS Z-scheme heterojunction photocatalysts
Source: Royal Society of Chemistry journal article supplement (doi:10.1039/d2en01033j), 2022-12-24
Supplement: d2en01033j1.pdf [file d2en01033j1.pdf]

## Supporting Information

### **Significant improvement and mechanism of tetracycline degradation with synergistic piezoelectric effect of ZnO/CuS Z- scheme heterojunction photocatalyst**

Qi Gao <sup>a</sup>, Luping Zhou <sup>a</sup>, Shuai Xu <sup>a</sup>, Shuqi Dai <sup>b</sup>, Qi Zhu <sup>a</sup> and Yuliang Li <sup>\*a</sup>

<sup>a</sup> Key Laboratory of Subsurface Hydrology and Ecological Effects in Arid Region,  
Ministry of Education, School of Water and Environment, Chang'an University, Xi'an,  
710064, China

<sup>b</sup> South China Advanced Institute for Soft Matter Science and Technology (AISMST),  
School of Molecular Science and Engineering, South China University of Technology,  
Guangzhou, 510640, China

\* E-mail: [yulianglee@hotmail.com](mailto:yulianglee@hotmail.com)

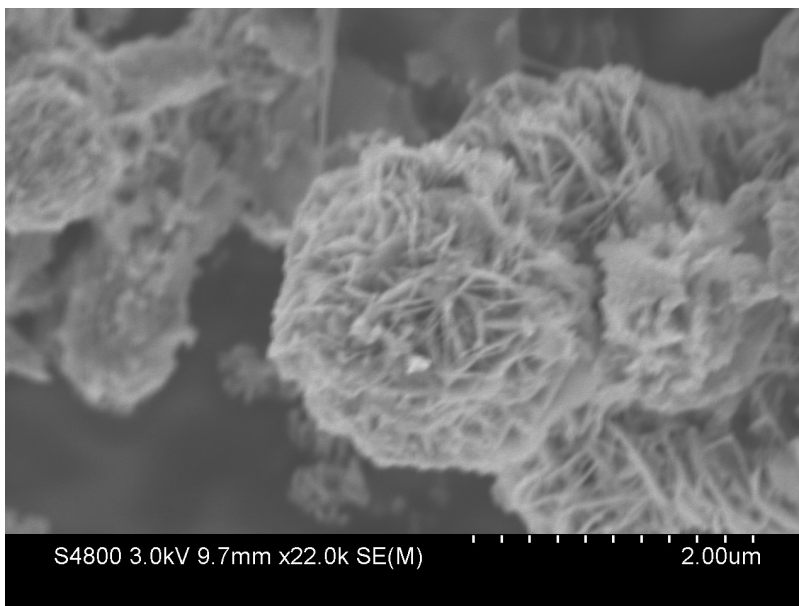

**Fig. S1** SEM image of CuS

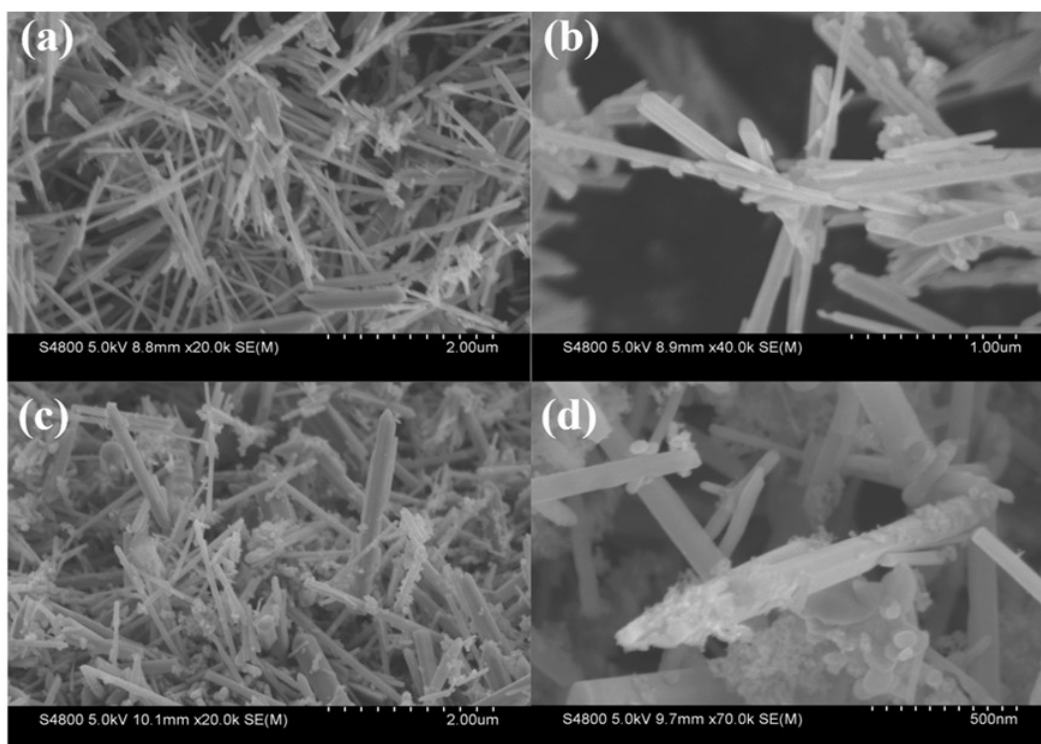

**Fig. S2** SEM image of (a) ZC-12, (b) ZC-10, (c) ZC-1 and (d) ZC-0.67

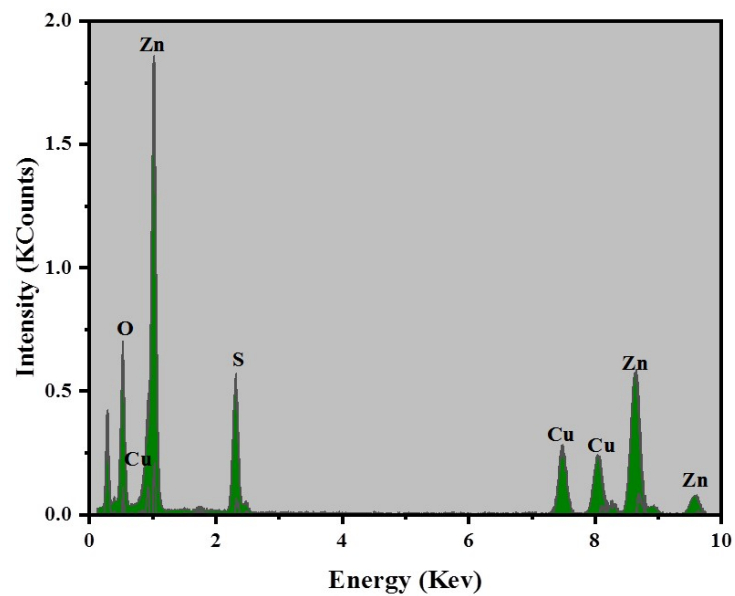

Fig. S3 EDS elemental microanalysis of ZC-10

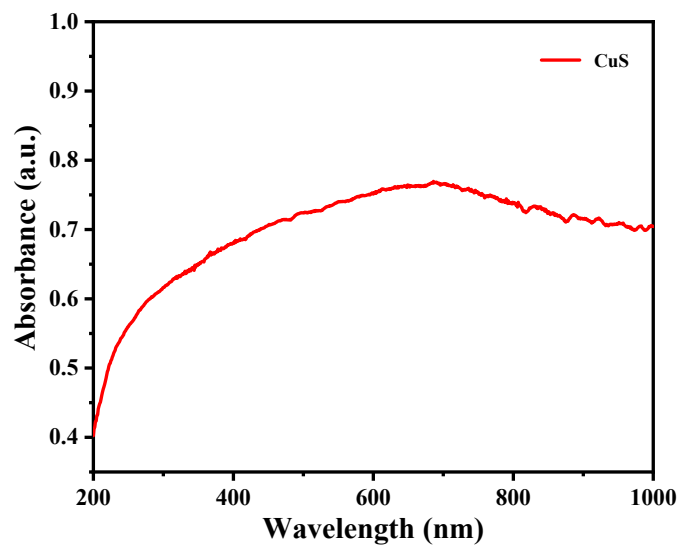

Fig. S4 UV-Vis absorption spectra of CuS

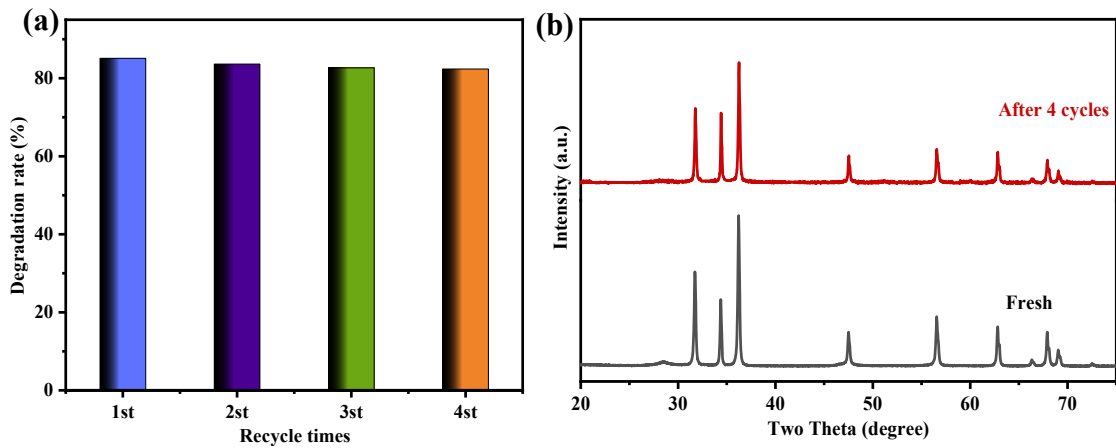

**Fig. S5** (a) Cycling experiment of ZC-10 piezo-photocatalytic degradation of TC and (b) XRD spectra before and after Cycling

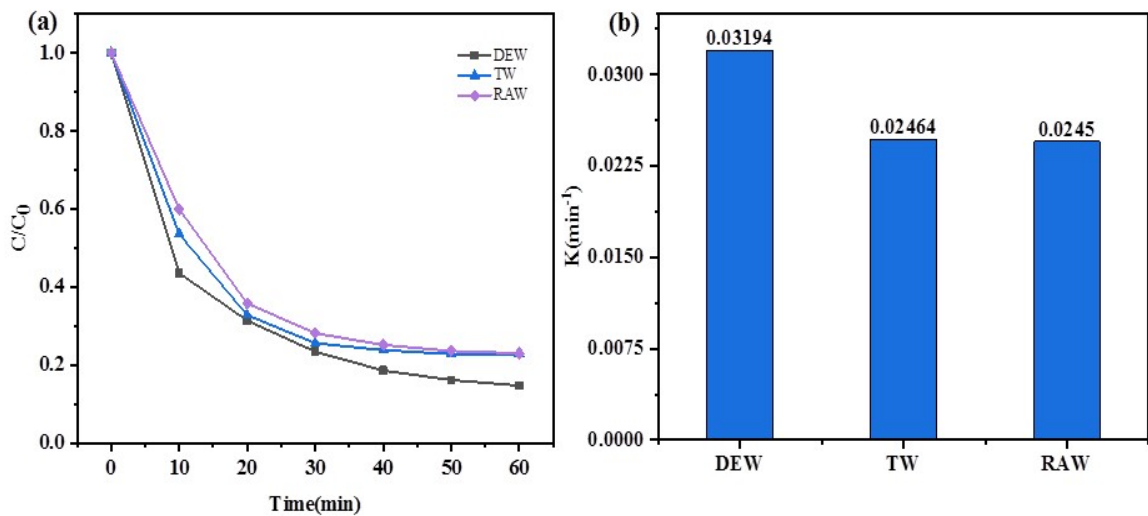

**Fig. S6** Piezo-photocatalytic degradation of TC in different water matrices over ZC-10

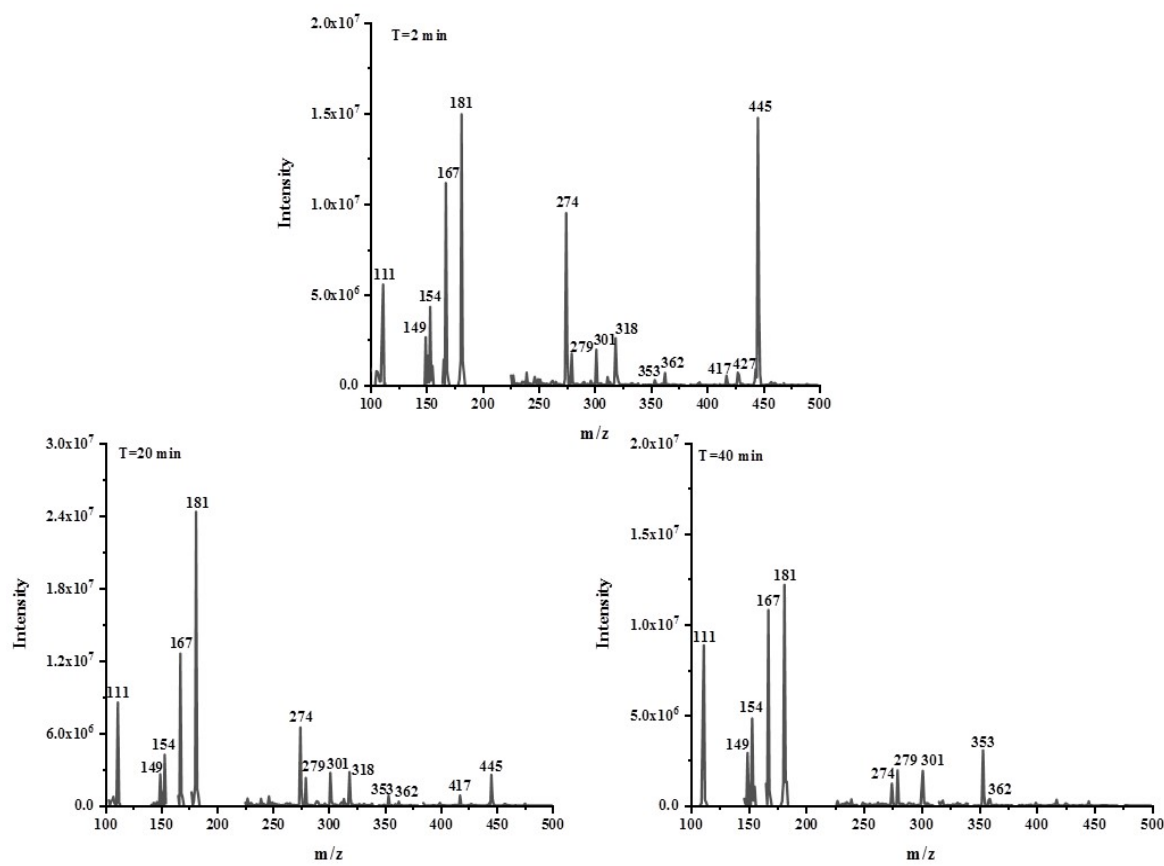

**Fig. S7** Mass spectra of the TC and intermediates eluted at different reaction time

**Table S1** Textural properties of ZnO, CuS and ZC-10 samples

| Sample | S <sub>BET</sub> (m <sup>2</sup> /g) | Pore Volume (cm <sup>3</sup> g <sup>-1</sup> ) | Pore diameter (nm) |
|--------|--------------------------------------|------------------------------------------------|--------------------|
| ZnO    | 11.805                               | 0.04287                                        | 3.370              |
| CuS    | 17.983                               | 0.06115                                        | 3.925              |
| ZC-10  | 26.118                               | 0.01253                                        | 3.465              |

**Table S2** Piezo-photocatalysts degradation of organic pollutants reported in literatures.

| Photocatalyst                                                         | Degraded organic pollutants | Dosage (mg/L) | Degradation concentration(mg/L) | Degradation time(min) | Degradation rate | Ref.             |
|-----------------------------------------------------------------------|-----------------------------|---------------|---------------------------------|-----------------------|------------------|------------------|
| ZnO                                                                   | MB                          | 1000          | 5                               | 120                   | 93%              | [1]              |
|                                                                       | RhB                         | 1000          | 5                               | 120                   | 90%              |                  |
|                                                                       | TB                          | 1000          | 5                               | 120                   | 81%              |                  |
| AgI/ZnO                                                               | RhB                         | 200           | 10                              | 80                    | 96.4%            | [2]              |
|                                                                       | MO                          | 200           | 10                              | 100                   | 95.8%            |                  |
|                                                                       | TC                          | 200           | 10                              | 120                   | 94.7%            |                  |
| ZnO@TiO <sub>2</sub>                                                  | MO                          | 1000          | 10                              | 120                   | 88%              | [3]              |
| CuS/ZnO                                                               | MB                          | 2000          | 5                               | 90                    | 100%             | [4]              |
| Bi <sub>2</sub> WO <sub>6</sub> /g-C <sub>3</sub> N <sub>4</sub> /ZnO | RhB                         | 1000          | 5                               | 20                    | 95.1%            | [5]              |
| ZnO/Al <sub>2</sub> O <sub>3</sub>                                    | MO                          | 100           | 50                              | 120                   | 81.3%            | [6]              |
| ZnO/BaTiO <sub>3</sub>                                                | RhB                         | 1000          | 10                              | 90                    | 100%             | [7]              |
| FeS/ZnO                                                               | MO                          | 1000          | 10                              | 50                    | 97%              | [8]              |
| <b>ZnO/CuS</b>                                                        | <b>TC</b>                   | <b>400</b>    | <b>30</b>                       | <b>60</b>             | <b>85.28%</b>    | <b>This work</b> |

## References:

- [1] Y. Chimupala, C. Phomma, S. Yimklan, N. Semakul and P. Ruankham, Dye wastewater treatment enabled by piezo-enhanced photocatalysis of single-component ZnO nanoparticles, *RSC Adv.*, 2020, 10, 28567-28575.
- [2] J. Liu, J. Chen, Z. Wu, K. Zhu, J. Wang, Z. Li, G. Tai, X. Liu and S. Lu, Enhanced visible-light photocatalytic performances of ZnO through loading AgI and coupling piezo-photocatalysis, *J. Alloys Compd.*, 2021, 852.
- [3] H. You, Z. Wu, Y. Jia, X. Xu, Y. Xia, Z. Han and Y. Wang, High-efficiency and mechano-/photo-bi-catalysis of piezoelectric-ZnO@photoelectric-TiO<sub>2</sub> core-shell nanofibers for dye decomposition, *Chemosphere*, 2017, 183, 528-535.
- [4] D. Hong, W. Zang, X. Guo, Y. Fu, H. He, J. Sun, L. Xing, B. Liu and X. Xue, High Piezo-photocatalytic Efficiency of CuS/ZnO Nanowires Using Both Solar and Mechanical Energy for Degrading Organic Dye, *ACS Appl. Mater. Inter.*, 2016, 8, 21302-14.
- [5] Z. Kang, K. Ke, E. Lin, N. Qin, J. Wu, R. Huang and D. Bao, Piezoelectric

polarization modulated novel Bi<sub>2</sub>WO<sub>6</sub>/g-C<sub>3</sub>N<sub>4</sub>/ZnO Z-scheme heterojunctions with g-C<sub>3</sub>N<sub>4</sub> intermediate layer for efficient piezo-photocatalytic decomposition of harmful organic pollutants, *J. Colloid. Interf. Sci.*, 2022, 607, 1589-1602.

[6] Q. Nie, Y. Xie, J. Ma, J. Wang and G. Zhang, High piezo-catalytic activity of ZnO/Al<sub>2</sub>O<sub>3</sub> nanosheets utilizing ultrasonic energy for wastewater treatment, *J. Clean. Prod.*, 2020, 242.

[7] X. Zhou, S. Wu, C. Li, F. Yan, H. Bai, B. Shen, H. Zeng and J. Zhai, Piezophototronic effect in enhancing charge carrier separation and transfer in ZnO/BaTiO<sub>3</sub> heterostructures for high-efficiency catalytic oxidation, *Nano Energy*, 2019, 66.

[8] X. Guo, Y. Fu, D. Hong, B. Yu, H. He, Q. Wang, L. Xing and X. Xue, High-efficiency sono-solar-induced degradation of organic dye by the piezophototronic/photocatalytic coupling effect of FeS/ZnO nanoarrays, *Nanotechnology*, 2016, 27, 375704.
